# Supplementary material for: Acute atrial arrhythmogenicity and altered Ca2+ homeostasis in murine RyR2-P2328S hearts
Source: PubMed Central journal article supplement — Cardiovasc Res. 2010 Jul 9;89(4):794–804. doi: 10.1093/cvr/cvq229 (PMC3039245; doi:10.1093/cvr/cvq229), 2010-07-09

## SUPPLEMENTARY FIGURES

*Supplementary Figure S 1. Low power light microscopy of atrial regions of WT, RyR2<sup>+/-</sup> and RyR2<sup>S/S</sup> hearts.*

Sections from WT (A, B), RyR2<sup>+/-</sup> (C, D) and RyR2<sup>S/S</sup> hearts (E, F) stained with hematoxylin and eosin (A, C, E) or Massons trichrome (B, D, F) showing no detectable structural abnormalities. Hearts of 6-month old mice (WT, RyR2<sup>+/-</sup> and RyR2<sup>S/S</sup>, n=3 in each group) were excised, following sacrifice by cervical dislocation (Schedule I, UK Animals (Scientific Procedures) Act (1986)). Hearts were perfused and then stored in 4% paraformaldehyde, for routine tissue processing and paraffin embedding. The paraffin blocks were then serially sectioned and stained with hematoxylin and eosin and Massons trichrome for light microscopy.

*Supplementary Figure S 2. Linescan reconstructions of Ca<sup>2+</sup> sparks in isolated atrial myocytes under resting conditions.*

Typical results from (A, B) WT hearts, (C, D) RyR2<sup>+/-</sup> and (E, F) RyR2<sup>S/S</sup> hearts before (A, C, E), and following (B, D, F) addition of isoproterenol.

Suppl fig. S1

WT

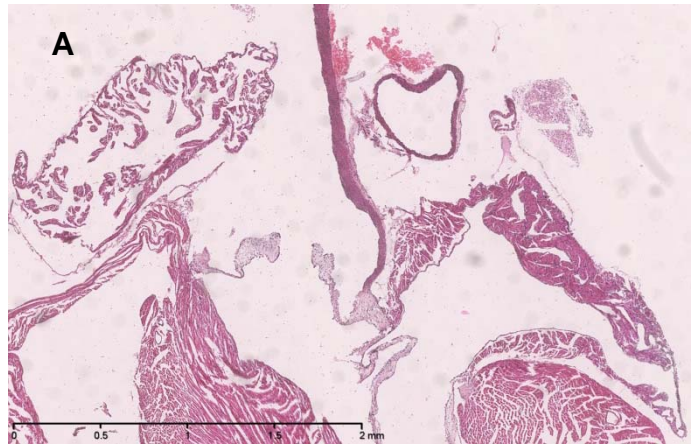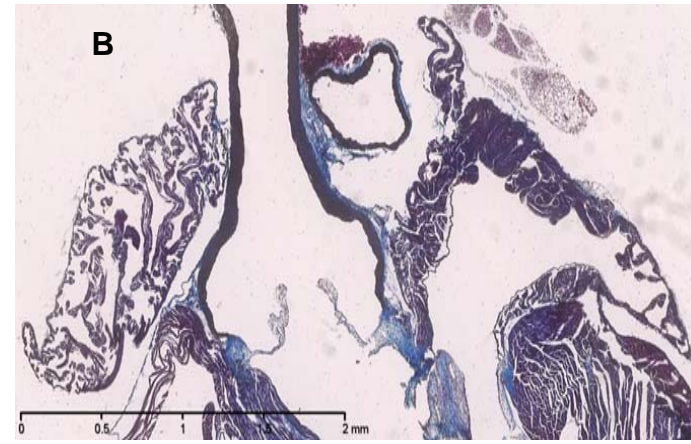

*RyR2<sup>+/-</sup>*

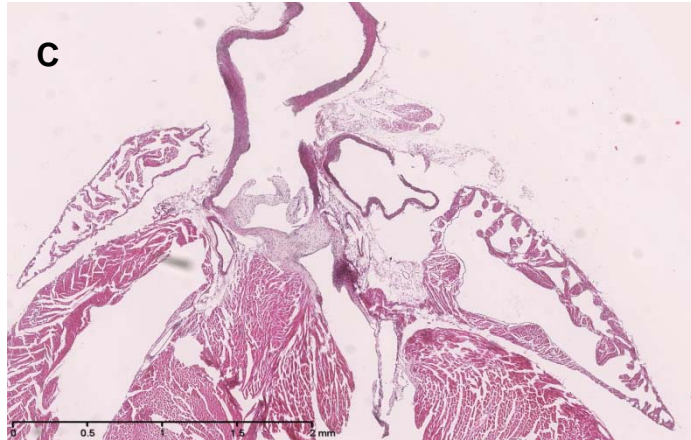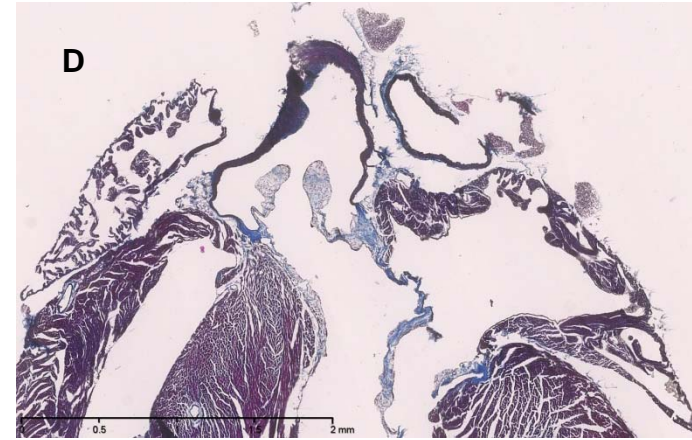

*RyR2<sup>S/S</sup>*

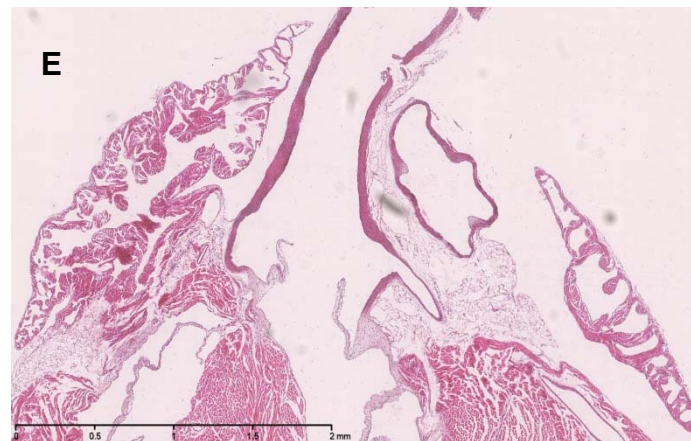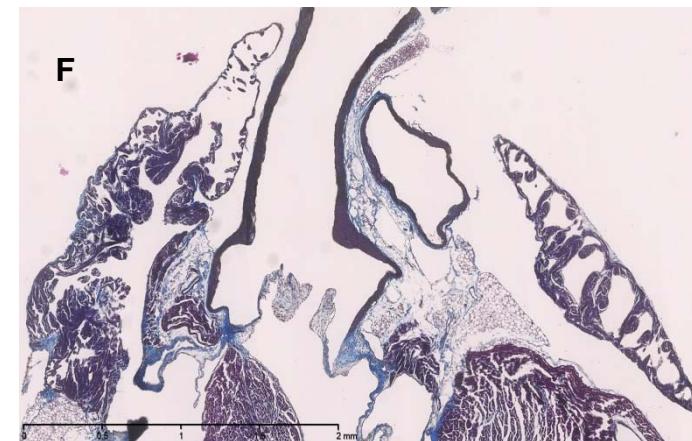

Suppl fig. S2

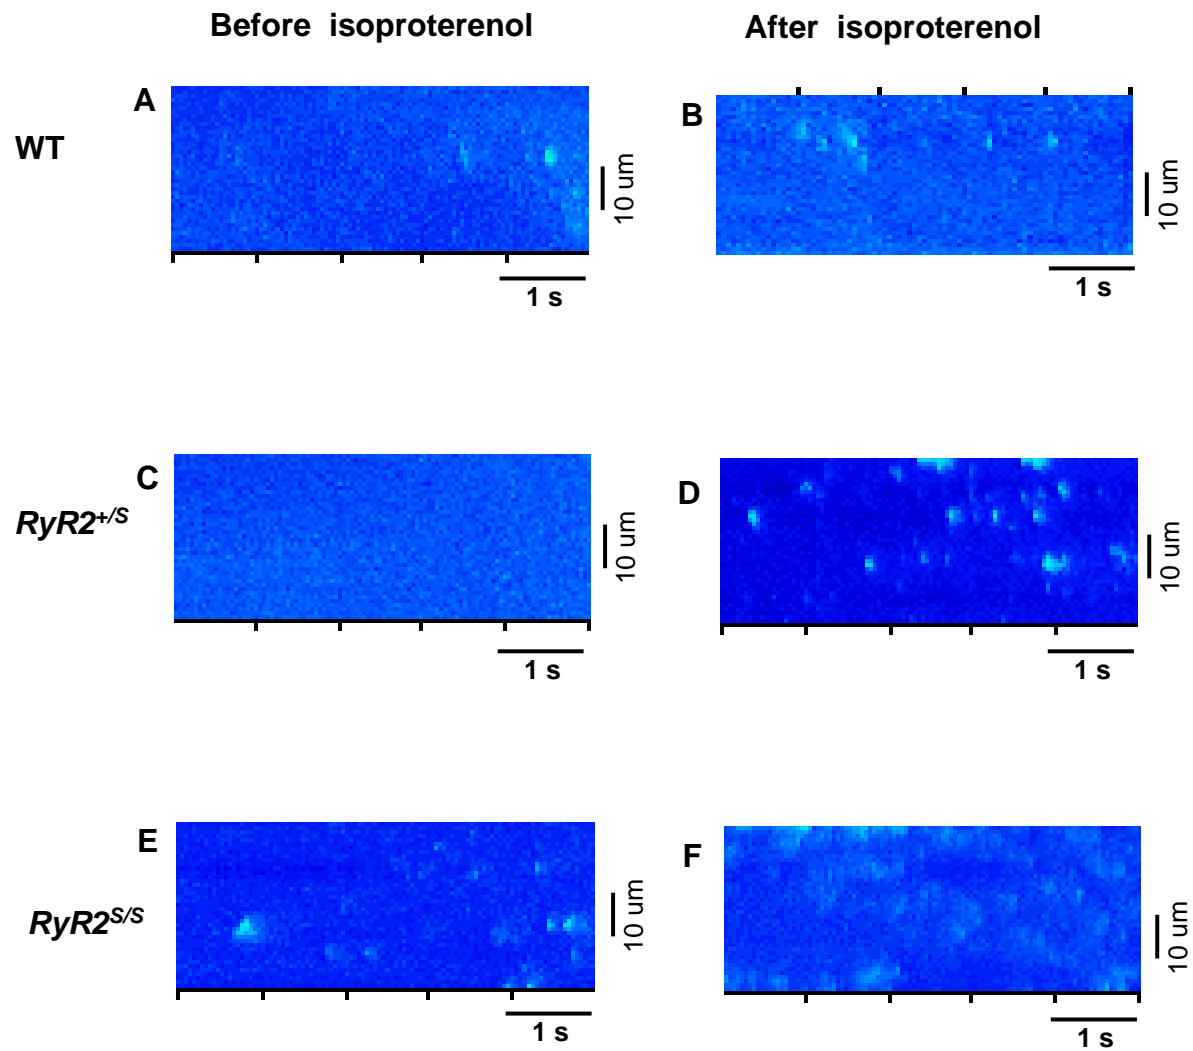

Supplement: supp_cvq229_cvq229supp.pdf [file supp_cvq229_cvq229supp.pdf]
